# Streetlights affect moth orientation beyond flight-to-light behaviour

Jacqueline Degen<sup>1\*</sup>, Mona Storms<sup>1</sup>, Chengfa Benjamin Lee<sup>2,3</sup>, Andreas Jechow<sup>4</sup>, Anna Lisa Stöckl<sup>5,6,7</sup>, Franz Hölker<sup>4,12</sup>, Aryan Jakhar<sup>8,9,10</sup>, Thomas Walter<sup>11</sup>, Stefan Walter<sup>12</sup>, Oliver Mitesser<sup>13</sup>, Thomas Hovestadt<sup>13</sup>, Tobias Degen<sup>13</sup>

<sup>1</sup>Department of Behavioral Physiology and Sociobiology, University of Würzburg, Würzburg, Germany.

<sup>2</sup>Department of Remote Sensing, University of Würzburg, Würzburg, Germany.

<sup>3</sup>German Aerospace Center (DLR), Remote Sensing Technology Institute (IMF), Berlin, Germany.

<sup>4</sup>Department of Community and Ecosystem Ecology, Leibniz Institute of Freshwater Ecology and Inland Fisheries (IGB), Berlin, Germany.

<sup>5</sup>Department of Biology, University of Konstanz, Konstanz, Germany.

<sup>6</sup>Centre for the Advanced Study of Collective Behavior, University of Konstanz, Konstanz, Germany.

<sup>7</sup>Zukunftskolleg, University of Konstanz, Konstanz, Germany.

<sup>8</sup>School of Biology, Indian Institute of Science Education and Research Thiruvananthapuram, Thiruvananthapuram, India.

<sup>9</sup>Department of Ecology, Evolution and Organismal Biology, Brown University, Providence, USA.

<sup>10</sup>Institute at Brown for Environment and Society, Brown University, Providence, USA.

<sup>11</sup>Department of Computer Science, University of Würzburg, Würzburg, Germany.

<sup>12</sup>Department of Biology, Freie Universität Berlin, Berlin, Germany.

<sup>13</sup>Department of Animal Ecology and Tropical Biology, University of Würzburg, Würzburg, Germany.

\*Correspondence to: [jacqueline.degen@uni-wuerzburg.de](mailto:jacqueline.degen@uni-wuerzburg.de)

## Keywords

Artificial light at night, light pollution, insect, moth, orientation, flight-to-light behaviour, movement pattern, barrier-effect

## 30 **Summary**

31 One of the most dramatic changes occurring on our planet in recent decades is the ever-  
32 increasing extensive use of artificial light at night, which drastically altered the environment  
33 nocturnal animals are adapted to <sup>1,2</sup>. One nocturnal species group experiencing marked  
34 declines are moths, which are not only of great importance for species conservation, but also  
35 for their key role in food webs and in ecosystem services such as nocturnal plant  
36 pollination <sup>3,4</sup>. Light pollution has been identified as a driver in the dramatic insect decline of  
37 the past years <sup>5-7</sup>, yet little is known about its impact on natural insect orientation behaviour.  
38 Using harmonic radar tracking, we show that the orientation of several species of moths is  
39 significantly affected by streetlights, although only 4 % of individuals showed flight-to-light  
40 behaviour. We reveal a species-specific barrier effect of streetlights on lappet moths whenever  
41 the moon was not available as a natural celestial cue. Furthermore, streetlights increased the  
42 tortuosity of flight trajectories for both hawk moths and lappet moths. Our results provide the  
43 first spatially resolved experimental evidence for the fragmentation of landscapes by  
44 streetlights and demonstrate that light pollution affects movement patterns of moths beyond  
45 previously assumed extent, potentially affecting their reproductive success and hampering a  
46 vital ecosystem service.

## 47 **Introduction**

48 The dramatic insect decline is one of the most concerning recent biological problems <sup>8,9</sup>.  
49 Among insects, pollinators are of particular importance. Because of their significance for  
50 insect-pollinated plants, ecosystem functioning and food security, their decline will have  
51 severe implications for humans as well <sup>3,4</sup>. While great focus has been dedicated to finding the  
52 causes and mitigating the decline of diurnal pollinators <sup>10,11</sup>, nocturnal pollinator decline is  
53 less well understood. At night, moths belong to the most important pollinators <sup>12,13</sup> and there

54 is also evidence for their decline in abundance and distribution <sup>14,15</sup>. In addition to general  
55 drivers of insect decline <sup>16</sup>, nocturnal pollinators are also threatened by light pollution <sup>5-7,17</sup>.  
56 Light threatened by pollution <sup>18</sup> is caused by artificial light sources used privately and  
57 publicly, all of which differ from natural light sources in spectrum and intensity <sup>19</sup>. Thus,  
58 artificial light at night (ALAN) changes and disturbs natural night environments with negative  
59 impacts from individual species to whole ecosystems, potentially affecting biodiversity <sup>20,21</sup>.  
60 Furthermore, ALAN disrupts the natural visual cues nocturnal insects rely on for  
61 orientation <sup>22-24</sup>. The most famous effect of artificial light sources is the strong phototactic  
62 response of moths, resulting in a flight towards light sources <sup>25,26</sup>. Such "flight-to-light  
63 behaviour" has been the focus of the majority of investigations <sup>27</sup>. Nevertheless, it is neither  
64 sufficiently understood why moths fly to the light, nor what exactly determines the attraction  
65 radius of a light source. Notably, as ALAN triggers maladaptive flight-to-light behaviour, it  
66 creates an "evolutionary trap" that reduces survival and reproduction <sup>28,29</sup>. Because of  
67 methodological constraints, previous studies on the effects of streetlights were restricted to  
68 specific locations, using capture-recapture experiments <sup>30,31</sup> and observations within the light  
69 beam of a single lamp <sup>32</sup> or theoretical models <sup>33,34</sup>. However, these results can only reveal the  
70 effects but not the causes for the impact of ALAN on moth behaviour. Understanding why  
71 streetlights affect movement behaviour and orientation performance requires measurements of  
72 the entire flight trajectories inside and outside of the illuminated area. We therefore used  
73 harmonic radar technology for the first time on several nocturnal pollinators, recording  
74 individual flight trajectories of moths at unprecedented spatial and temporal resolution within  
75 1 km range.

## 76 **Results**

### 77 **Hardly any moth terminated its flight at a streetlight**

78 To investigate the influence of ALAN on the flight behaviour of moths, we recorded the flight  
79 trajectories of hawk moths (*Laothoe populi*, *Deilephila elpenor*, *Sphinx ligustri*) and lappet  
80 moths (*Euthrix potatoria*, Tab. S1) with harmonic radar (Fig. 1). Since this technique requires  
81 a certain handling procedure for the attachment of the necessary transponder, we confirmed in  
82 control experiments that flight behaviour was not significantly affected (see methods). Males  
83 were released one-by-one in the centre of six circularly arranged high pressure sodium  
84 streetlights (radius: 85 m, Fig. 1b). To compensate for daily fluctuations in weather and  
85 ambient light conditions, a similar number of individuals was tested each day with these lights  
86 either turned on or off. Out of the 50 animals that were released with the streetlights turned  
87 on, only two individuals (4%) terminated their flights directly at a streetlight (Fig. 1a, flight  
88 trajectories of the two individuals Fig. 1c). The positions of last waypoints of all other flights  
89 were widely scattered within the detection range of the radar (Fig. 1a) and there was no  
90 significant difference in the distance of the last recorded waypoint to the nearest streetlight  
91 between “light on” an “light off” conditions (Mann-Whitney  $U$ -test:  $U(50,45) = 1079.5$ ,  
92  $P = 0.735$ ). To ensure that the light sources used in the experiments (Fig. S1 & S2) generally  
93 triggered the disrupted behaviour described in literature <sup>35</sup>, we released seven moths of the  
94 species *Sphinx ligustri* in front of a streetlight at a distance of 10 m. All these males showed  
95 the typical behaviour of circling around the light at different heights and crashing to the  
96 ground from time to time until they stay motionless on the ground <sup>36</sup>. This indicates that the  
97 streetlights we used influenced the behaviour in the expected, disruptive way within a close  
98 range ( $\leq 10$  m) when the light source was above the moth at the time of release.

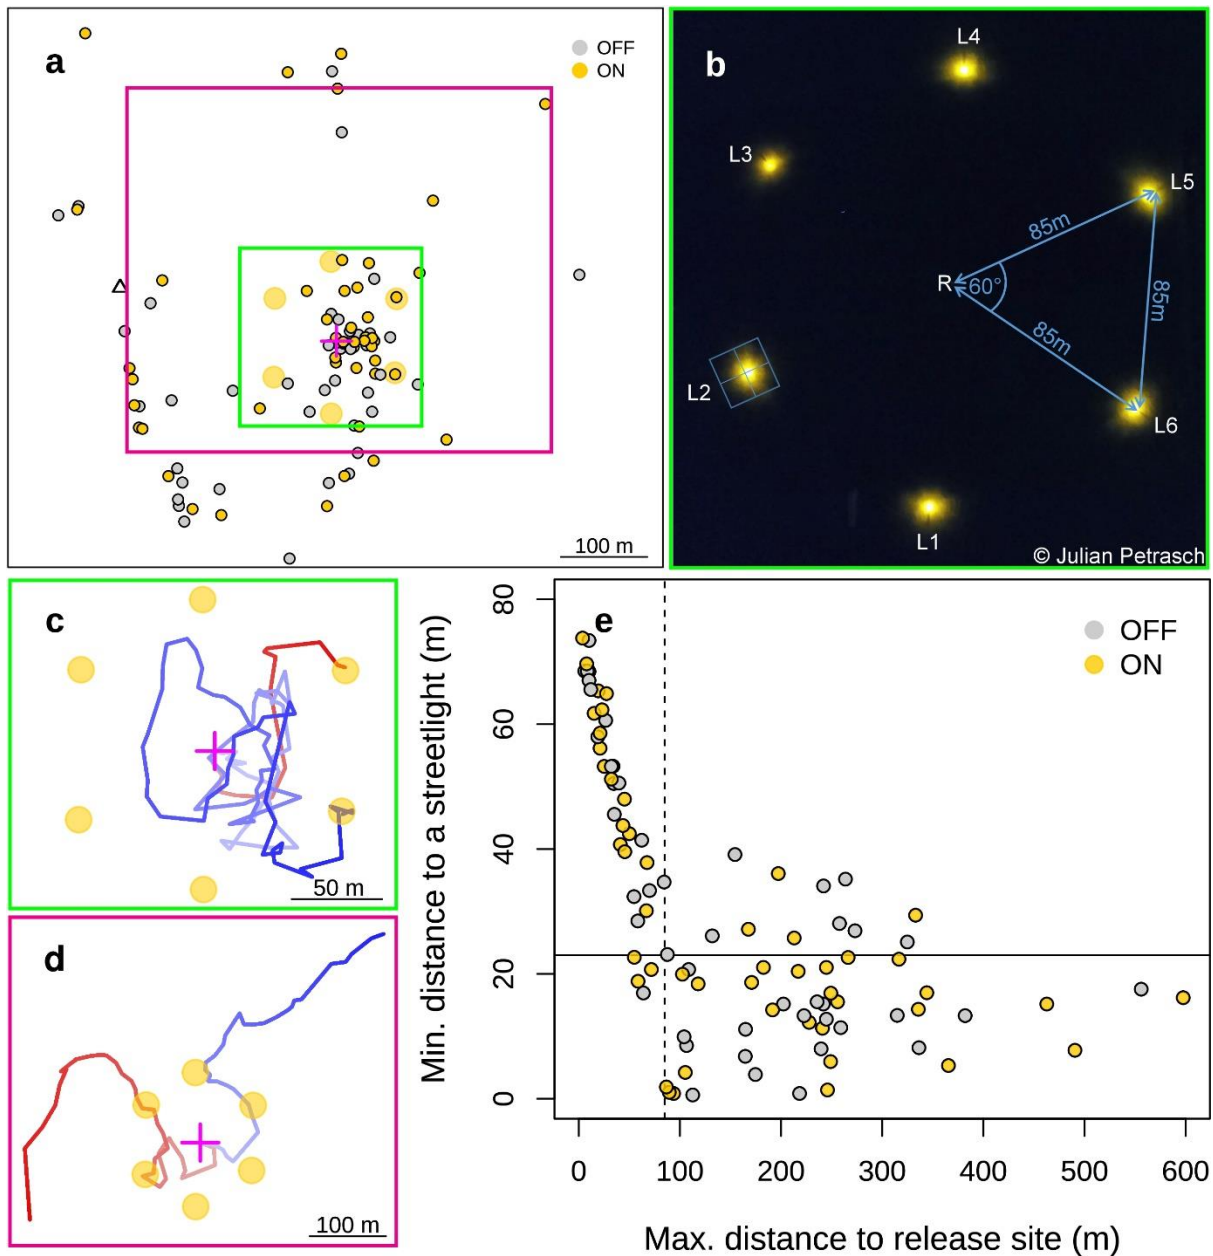

99

100 **Fig. 1 Final positions of tracked moths and flight proximity to a streetlight.** **a**, Final  
101 recorded positions of all tracked moths ( $n = 95$ ). **b**, Arrangement of the six high-pressure  
102 sodium streetlights used in the experiment imaged from a drone (picture taken by Julian  
103 Petrasch). The distance between the release site and each streetlight as well as the distance  
104 between them was 85 m. Please note that light cones of single streetlights did not overlap.  
105 Representative illuminance measurements of one streetlight (L2) are indicated by the blue  
106 square and corresponding values are illustrated in Fig. S1. **c**, Flight trajectories of the only  
107 two individuals that showed flight-to-light behaviour and ended their flight at a streetlight. **d**,  
108 Representative flight examples of individuals that passed an illuminated streetlight closer than  
109 10 m and continued their flight ( $n = 6$ ). **e**, Maximum distance to the release site and minimum  
110 distance to a streetlight at any time during a flight for all tracked moths ( $n = 95$ ). The

111 attraction radius of 23 m (indicated by the solid horizontal line) was calculated in a previous  
112 experiment using the same type of streetlights<sup>37</sup>. Since each of the six streetlights was located  
113 85 m away from the release site, this distance marks the minimum flight distance to arrive at a  
114 streetlight, as indicated by the dashed vertical line. **a-d**, All figures are aligned to the north.

115 Next, we analysed whether the males we released at the release site passed a streetlight within  
116 the attraction radius, i.e. the distance to a light that elicits flight-to-light behaviour, as males  
117 might have left the circle of the six streetlights without entering into any attraction radius. The  
118 attraction radius of high pressure sodium streetlights is estimated to be 23 m for moths in  
119 general<sup>37</sup>. We therefore expected that all individuals that enter any streetlight's attraction  
120 radius (Fig. 1e, solid horizontal line) would show a positive phototactic response and thus  
121 terminate their flight near a light (Fig. 1e, dashed vertical line). However, apart from two  
122 moths that actually showed flight-to-light behaviour (Fig. 1c), 23 individuals entered the  
123 attraction radius of a streetlight but continued their flight and left the attraction radius again  
124 rather than showing flight-to-light behaviour (Fig. 1e, all individuals displayed with filled  
125 circles below the solid horizontal line and right of the dashed vertical line). The distance to  
126 streetlights passed during a flight in the "light on" and "light off" condition did not differ  
127 significantly (*t*-test:  $t_{54} = 0.434$ ,  $P = 0.666$ ) for moths that left the circle of streetlights  
128 (Fig. 1e, right of dashed line). We therefore conclude that most individuals were not attracted  
129 by the streetlights, even though they entered the attraction radius. Six moths (12 %) even  
130 passed an illuminated streetlight closer than 10 m without interrupting their flight  
131 (representative flight examples: Fig. 1d), a distance we have demonstrated to elicit flight-to-  
132 light behaviour when the animal was released from the ground (see above). Although the  
133 harmonic radar did not provide any information about the flight altitude, the flight direction  
134 could be communicated during the flight to the experimenter at the release site. This allowed  
135 to monitor the illuminated area of a streetlight more closely as soon as an individual  
136 approached it. Since we did not see any of the six individuals that passed a streetlight but

137 continued their flight within the illuminated area, we hypothesise that they passed above the  
138 streetlight. We therefore suggest that flight altitude may be critical when assessing the  
139 attractiveness of a streetlight.

#### 140 **Streetlights induced a species-specific barrier-effect**

141 Although the light cones of the six circularly arranged streetlights did not overlap (Fig. 1b),  
142 this circle of streetlights might have created a barrier-effect, an “invisible wall” the moths  
143 were incapable to pass. Indeed, many individuals did not fly far enough to reach a streetlight  
144 (Fig. 1e, flights left of vertical dashed line) even though they initiated their flight properly and  
145 vanished from the field of view of the observer. Thus, these moths terminated their flight  
146 shortly after take-off. However, the streetlights did not create a barrier-effect for hawk moths,  
147 irrespective of the presence of the moon as a natural celestial cue (Fig. 2 a & b; Fisher tests  
148 for difference in fraction of animals leaving the circle with moon present and absent:  $P = 1$ ,  
149  $P = 0.57$ ). In contrast, lappet moths were significantly prevented from leaving the circle of  
150 streetlights once these were turned on and the moon was not visible as natural celestial cue  
151 (Fig. 2 c & d, Fisher tests for difference in fraction of animals leaving the circle with moon  
152 present and absent:  $P = 0.58$ ,  $P = 0.038$ ). Thus, the illuminated circle of streetlights created a  
153 barrier effect for lappet moths when the moon was not visible. This is particularly interesting,  
154 because the wide stretches of unlit space between the streetlights (Fig. 1b) have not been  
155 sufficient enough for these moths to leave the circle of streetlights. Although we cannot  
156 determine which feature of moonlight enabled lappet moths to leave the illuminated circle of  
157 streetlights, the results confirm earlier findings showing that the moon can have a strong  
158 influence on the orientation of moths<sup>38</sup>.



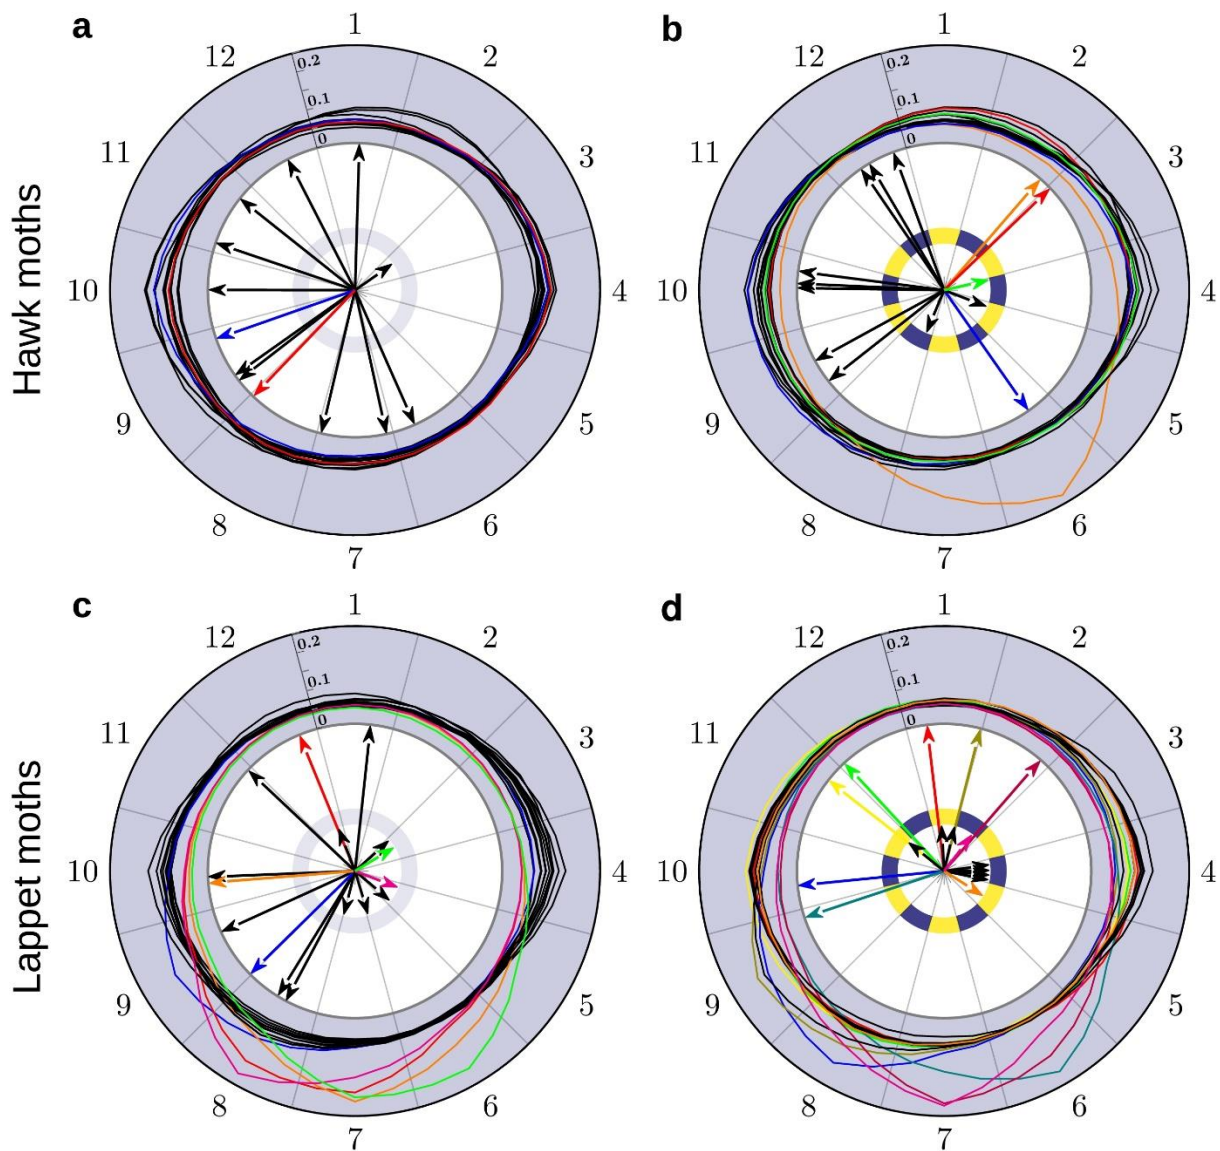

159

160 **Fig. 2 Linking flight directions and distances to the light environment.** Flight directions  
161 were analysed separately for the conditions when lights were turned off (a, c) or on (b, d). For  
162 this analysis, the environment was divided into 12 sectors spanning 30° each, with odd-  
163 numbered sectors representing the position of a streetlight. The sectors are numbered  
164 clockwise in each plot, with the flight directions displayed as one arrow for each individual.  
165 Animals that did not leave the circle of streetlights are displayed with short arrows and those  
166 that left the circle by long ones. We divided all-sky images taken in parallel to the experiment  
167 (see methods) into the same sectors and calculated the mean luminance (“brightness”) for  
168 each single sector to link moth’s flight direction to the luminance of the surroundings.  
169 Luminance was normalized to compare light distribution patterns independent of varying light  
170 conditions of different nights (see methods) and the corresponding scale is displayed at the  
171 left boundary of sector one. Arrows when the moon was visible above the horizon are  
172 displayed in colour, matching the corresponding luminance distributions. Except when fully



173 overcast ( $n = 4$ ), the brightness was always highest in the sector where the moon was located,  
174 allowing to assess the flight direction in respect to the position of the moon. When the moon  
175 was below the horizon, flight directions as well as the corresponding brightness values are  
176 displayed in black.

177 Although we conducted the experiments in a relatively dark area, the surroundings featured a  
178 considerable amount of artificial light, ranging from streetlights of the close-by village  
179 Großseelheim to skyglow from distant cities (for details see methods). We quantified the light  
180 environment at the beginning of every flight via an all-sky image <sup>39</sup>. Because the nocturnal  
181 light environment varied considerably between different nights, we normalized luminance for  
182 each image to identify the brightest sectors (Fig. 2). We found that the sectors with skyglow  
183 emerging from the towns Kirchhain and Stadtallendorf (Fig. 2, sector 4) and Marburg (Fig. 2,  
184 sector 10) were usually the brightest ones, with the moon overriding this pattern (e.g. Fig. 2b  
185 orange curve). Since flight directions were randomly distributed in all cases (Rayleigh-test for  
186 hawk moths with ( $P = 0.10$ ) and without ( $P = 0.23$ ), and for lappet moths with ( $P = 0.080$ )  
187 and without ( $P = 0.51$ ) moon above the horizon), we conclude that moths did not fly into the  
188 direction of greatest sky brightness, respectively (weak) skyglow. This was also true when the  
189 moon was the brightest spot, indicating that the corresponding individuals (Fig. 2, flight  
190 directions (arrows) and brightness distribution (curves) are colour coded) did not fly directly  
191 in the direction of the moon.

### 192 **Streetlights increased the tortuosity of flights**

193 The tortuosity of an animal's path is a key parameter in orientation, including search  
194 behaviours, and is inversely related to the efficiency of the orientation mechanism involved  
195 for oriented flights while it reflects searching intensity for local search flights <sup>40</sup>. Depending  
196 on the moths' natural habitat, we expected different flight behaviours (directed or search  
197 flights) for different species. Since all hawk moth species in our study were collected outside  
198 of the experimental field, the test site can be assumed not to be a preferred habitat at this time

199 of the year. We thus expected a directed and therefore straight flight out of the detection range  
200 of the radar to the surroundings. All lappet moths, on the other hand, already inhabited the  
201 experimental field and were expected to perform local search flights for resources (e.g.  
202 females). According to Benhamou <sup>40</sup>, the tortuosity of flights needs to be calculated  
203 differently for oriented and search flights: while the tortuosity of oriented flights (hawk  
204 moths) needs to be calculated based on a straightness index, the tortuosity of local search  
205 flights (lappet moths) can be reliably estimated by a sinuosity index (see methods). To  
206 investigate the effect of streetlights on orientation and search behaviours, we therefore  
207 analysed whether turning on the streetlights elicited a change in the tortuosity of flights (Fig.  
208 3).

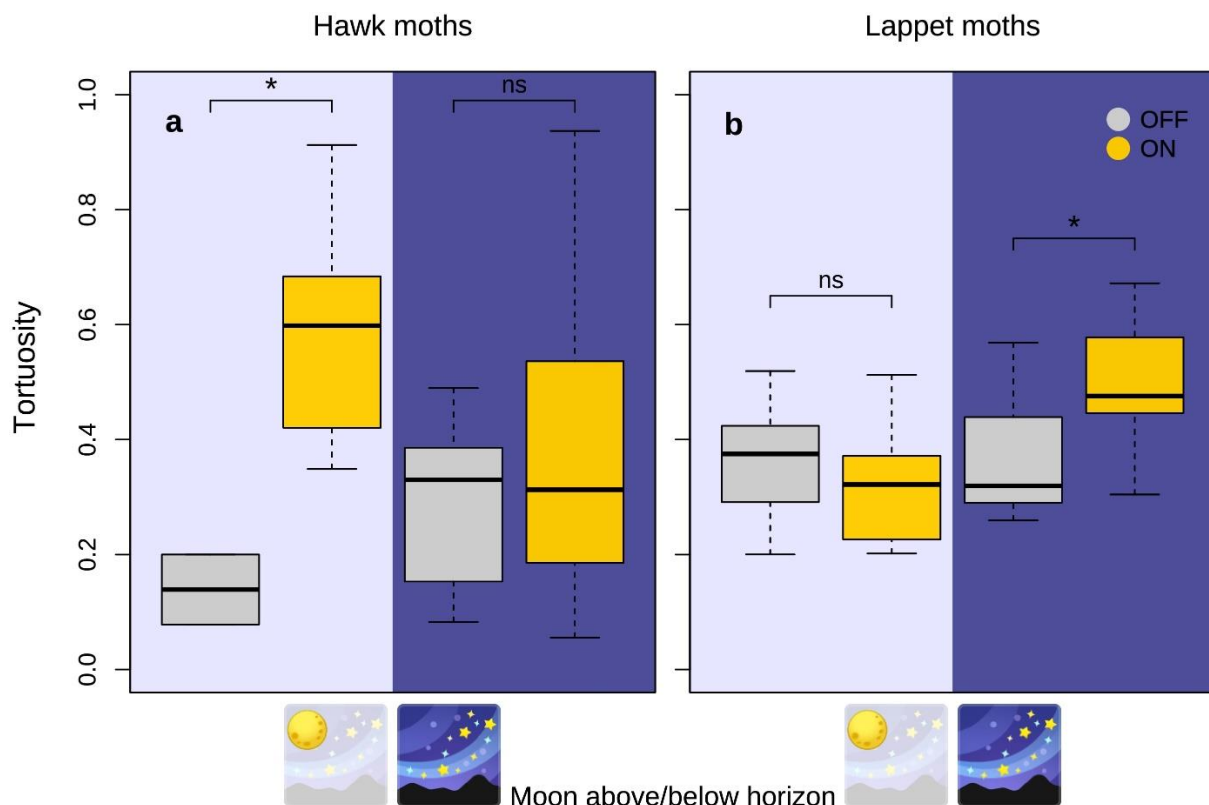

209  
210 **Fig. 3 The effect of artificial light on the tortuosity of flights.** a, b, Tortuosity of flights  
211 when streetlights were off or on in the presence or absence of the moon (sample sizes see Tab.  
212 S1). The tortuosity of oriented flights (hawk moths (a)) is inversely related to the efficiency of  
213 the orientation mechanism involved, while it reflects searching intensity for local search  
214 flights (lappet moths (b)). A value of 0 represents a perfectly straight flight and a value of 1 a

215 very curvy flight. Values are displayed separately for hawk moths (**a**;  $n = 35$ ) and lappet  
216 moths (**b**;  $n = 54$ ), and nights when the moon was above the horizon (left) or below the  
217 horizon and therefore not visible (right). Box plots show the median (black line), the  
218 interquartile range (grey or orange box) and the minimum and maximum value within 1.5  
219 times the interquartile range of the box (whiskers). Statistics: General Linear Model (GLM),  
220 significant differences ( $P < 0.05$ ) are marked by \*.

221 Hawk moths, which were not native to the experimental field, were expected to leave it fastest  
222 on a straight line. Indeed, when the streetlights were turned off, we observed rather straight  
223 flights, represented by a low tortuosity, especially when the moon was visible above the  
224 horizon (Fig. 3a, beta regression with post-hoc tests see Tab. S2). Switching on the  
225 streetlights significantly increased the tortuosity of flights when the moon was above the  
226 horizon, meaning that flights became less directed (Fig. 3a). Lappet moths, which were native  
227 to the experimental field, were expected to search for resources. Indeed, they generally had  
228 less directed flights compared to those of hawk moths when the streetlights were turned off,  
229 which likely reflects their search activity for local resources. When streetlights were turned  
230 on, the tortuosity of flights increased significantly when the moon was below the horizon  
231 (Fig. 3b, Beta regression with post-hoc tests see Tab. S3). Thus, our experiments revealed for  
232 both moth groups a significant change in flight behaviour when the streetlights were turned  
233 on.

## 234 **General discussion**

235 The harmonic radar technique revealed a significant impact of streetlights on the flight  
236 behaviour of different species of moths even beyond the illuminated area. In addition to the  
237 barrier-effect on lappet moths, the significant increase in the tortuosity of flights caused by  
238 streetlights is of particular importance, because it relates to the orientation of individuals. Our  
239 results demonstrate for the first time that streetlights affect the orientation of moths although  
240 they do not show flight-to-light behaviour. This discovery adds a new dimension to the impact

241 of light pollution on local movements of moths, which was previously not considered due to  
242 methodological constraints. Our finding that only very few moths showed flight-to-light  
243 behaviour although many entered the attraction radius of a streetlight raises the question why  
244 only such a low fraction got attracted. Generally, high pressure sodium streetlights are  
245 considered to be “insect-friendly” because of the spectral composition of their light emissions  
246 (Fig. S2, s.a. Eisenbeis <sup>36</sup>), yet various studies have documented that nocturnal moths get  
247 attracted by and fly towards this type of lights <sup>41–43</sup>. This is particularly true for hawk moths  
248 and lappet moths as demonstrated by light-trap catches <sup>37</sup>. Our results suggest that the  
249 observation of moths trapped at streetlights only concern a small fraction of individuals that  
250 pass a streetlight in free-flight. Since we showed that orientation performance is negatively  
251 influenced by streetlights in general, light-trap catches might underestimate the impact of  
252 ALAN since only individuals showing flight-to-light behaviour are sampled. Although other  
253 explanations are possible, we emphasize the hypothesis that flight-to-light behaviour is  
254 triggered as a function of flight altitude, extending the attraction radius to a three-dimensional  
255 space. Thus, flight altitude might be of utter importance in this context and should be  
256 investigated in free-flying moths, using promising new methods that allow 3D-tracking once  
257 these have been fully developed for such demands <sup>44,45</sup>.

258 The flight altitude of individuals may also explain why we found a barrier effect of  
259 streetlights for lappet moths but not for hawk moths (Fig. 2). Since the experimental lappet  
260 moths already inhabit the exact meadow where the experiments were performed while hawk  
261 moths do not, it seems reasonable to assume that lappet moths fly at lower altitudes to search  
262 for local resources while hawk moths may increase their flight altitude quickly after take-off  
263 to reach more favourable habitats. The barrier effect of streetlights on lappet moths is of  
264 particular importance, as it provides the first experimental evidence for the commonly  
265 postulated fragmentation of habitats by streetlights <sup>6,37,46</sup>. Since the distance between the

266 streetlights and thus the dark areas between the lights were unusually large compared to  
267 standard street lighting (Fig. 1b), it is likely that the barrier effect would be even stronger with  
268 the typical streetlight design. For example, in Europe pole distances of municipal streetlights  
269 for roads are between 25 and 45 m<sup>47</sup>. Furthermore, we show a clear interaction between  
270 moonlight and ALAN, which should be taken into consideration for future studies on the  
271 impact of ALAN on nocturnal animals. Moon elevation and disk illumination should be  
272 reported in all studies, as effects of moonlight might mask or amplify the effects of ALAN.

273 Taken together, the harmonic radar technique revealed that streetlights affect moth orientation  
274 beyond flight-to-light behaviour, indicating a fundamentally novel dimension of impact at a  
275 local scale. This is of crucial importance for the probability of survival and mating success  
276 and supports the findings of Giavi et al.<sup>48</sup> that ALAN can affect ecosystem functioning in  
277 areas not directly illuminated. Since it has also been shown that ALAN is a threat to  
278 pollination<sup>49</sup> and potentially even alters diurnal plant-pollinator interactions<sup>50</sup>, a reduced  
279 orientation performance of moths might represent a further parameter in fragile pollination  
280 networks. As the reduced orientation performance occurred independent of a disoriented  
281 behaviour caused by flight-to-light behaviour, we conclude that the negative effects of light  
282 pollution on moths have been underestimated to date.

## 283 **Methods**

### 284 *Experimental Design*

285 A harmonic radar (Raytheon Marine GmbH, Kiel, NSC 2525/7 XU) was used to track the  
286 flight paths of individual moths. This technique is well established for the investigation of  
287 navigation and orientation in honeybees<sup>51,52</sup>, bumblebees<sup>53,54</sup> and diurnal pollinators<sup>55,56</sup> and  
288 could be easily conveyed to moths. The functional principle is described by Riley et al.<sup>57,58</sup>.

289 The study site was located on an open flat pasture close to the small village Großseelheim,  
290 Germany. In the main experiment, all animals were released at the same location in the field  
291 (50°48'50.3"N, 8°52'32.7"E). Although the edge of Großseelheim was only about 430 m away  
292 from the release site and the towns Amöneburg, Kirchhain and Stadtallendorf (distance to  
293 release site: 3.7 km, 3.7 km and 10 km, respectively) as well as the cities Marburg and  
294 Giessen (Distance to release site: 7 km and 30 km) were not far away, the study area was  
295 relatively dark and not strongly impacted by skyglow<sup>38</sup>. Six typical streetlights (GeoTechnik  
296 Kelvin-LED 1; c. 3.5 m high) equipped with high pressure sodium bulbs (70 W, 2000 K,  
297 96 lm W<sup>54</sup>; NAV-E 70/E SON E27; Osram, Munich; Germany, s.a. Perkin et al.<sup>59</sup>) were  
298 arranged uniformly in a circle around the release site with each light at a distance of 85 m to  
299 the release site and to its nearest neighbours (Fig. 1b). We used this type of streetlights to  
300 obtain representative results for the impact of common street lighting, since they are still one  
301 of most prevalent types<sup>60</sup>. The lights were either switched off to record the flight trajectories  
302 under conditions without near-by artificial lights, or switched on to test the influence of  
303 streetlights on flight behaviour. It is important to note that the light cones of the lights did not  
304 overlap (Fig. 1b).

305 The experiments were performed from 10 June 2018 until 29 July 2018. During this time, we  
306 recorded 95 flights of 94 individuals of various species, nearly all of them either belonging to  
307 the family of lappet moths or hawk moths (Tab. S1). All hawk moths were collected with a  
308 large light trap that was built up every night at changing locations in the surroundings of the  
309 experimental area, far enough away to exclude visibility from the release site. Lappet moths  
310 were captured at the experimental field before the start of experiments. To this end, field paths  
311 were slowly followed with a car. Once a lappet moth got into the spotlight of the car, it  
312 merely made uncoordinated movements on the ground and could be captured easily.



313 After a moth was captured, it was kept in the dark and transported to the release site. Between  
314 capture and release of a moth there was a minimum acclimation time of 40 min (usually more  
315 than 60 min), and we assume that animals were dark-adapted at the time of take-off. When the  
316 animals were kept for longer times, they were fed with sugar solution (2M) to ensure that they  
317 had enough energy to perform a flight (except for *Euthrix potatoria* that do not assimilate  
318 food as adults). The animals were prepared with the transponder, the necessary antenna for  
319 radar tracking, shortly before their release. The procedure to attach the transponder to the  
320 thorax of a moth takes about 30 s and requires some light. To ensure that the moths' vision  
321 did not get affected, we used only red light, which is not perceivable by most moth species  
322 including Sphingidae<sup>61</sup>. Additionally, we tested a possible impact of the handling procedure,  
323 including the use of red light, during the control experiments (see below). We were able to  
324 follow the animals' flights for up to 1 km with the position updated every 3 s.

### 325 *Light environment*

326 Moon phase and position were retrieved from <https://www.timeanddate.de>. The nocturnal  
327 light conditions were monitored with a calibrated all-sky camera (Canon EOS 6D, Sigma EX  
328 DG 8mm fisheye lens 180°)<sup>38,39,62</sup>. By obtaining an image at the start of each flight, we were  
329 able to measure spatially resolved sky brightness for each flight. For the analysis, luminance  
330 ( $L_v$  unit mcd/m<sup>2</sup>) was calculated for each pixel with the software "Sky Quality Camera"  
331 (version 1.8.1, Euromix, Ljubljana, Slovenia).

332 Illuminance and spectra of each streetlight were measured with a spectroradiometer in  
333 irradiance mode with a cosine corrected detector head (JETI Specbos 1211UV, Jena  
334 Technische Instrumente, Jena, Germany) at a height of 1.5 m because the vegetation did not  
335 allow a measurement exactly at ground level. Illuminance measurements were performed in a  
336 grid using a 2 m spacing along the main axis of the streetlight up to a distance of 10 m. Outer  
337 grid points were obtained in a 5 m spacing. An example grid is shown in Fig. S1 and an

338 example spectrum in Fig. S2. Apart from the main axes, we measured at intervals of 5 m. The  
339 illuminance measurements and the drone image obtained at the beginning of the experiment  
340 revealed that lamp 3 (L3) had to be replaced to ensure equal brightness for all six lamps.

#### 341 *Control experiments*

342 To assess possible effects of the preparations needed for flight tracking via harmonic radar on  
343 natural flight behaviour<sup>63,64</sup>, we performed four different control experiments with other  
344 males of the species *Sphinx ligustri* than those tested during the experiment with the harmonic  
345 radar. To this end, males were released from the same release site as the ones of the radar  
346 experiment, but the six streetlights were not turned on at any time. To create goals in the field,  
347 females (also *Sphinx ligustri*) operating as pheromone traps were positioned north and south  
348 of the release site in a distance of 105 m. We were therefore able to record the arrival  
349 frequency as well as the time males needed to reach the females using a stop watch. The same  
350 males were (1) prepared with a transponder and fed with sugar solution (2M) more than three  
351 hours before they were released. Afterwards, they were stored on a little wooden plate below  
352 a tin until the start of experiments, allowing a release without the need of the handling  
353 procedure to attach the transponder or the use of any light. On another day, these males were  
354 (2) prepared with a transponder directly before the flight, (3) experienced the same handling  
355 procedure as the animals in (2) but without attaching a transponder and (4) were released  
356 without a transponder and experienced no handling procedure at all by just storing them  
357 below tins as in experiment (1). Thus, the same set of males was tested in all four  
358 experiments, but not necessarily every individual went through all four experiments. Neither  
359 the arrival frequency (Fisher's exact test:  $P = 0.887$ ), nor the time successful males needed to  
360 reach the females located 105 m away differed significantly between the four groups  
361 (GLMM:  $F_{3,31} = 0.81$ ,  $P = 0.505$ ). In accordance with our former results acquired for

362 honeybees <sup>65</sup>, we can therefore be confident that the flight behaviour was not significantly  
363 affected by the tracking technique in our experiments.

#### 364 *Data analysis*

365 For the detailed analysis of flight behaviour (Fig. 2 & 3), only hawk moths and lappet moths  
366 were analysed due to sample size (Tab. S1). Flights with a total flight distance below 85 m  
367 that could not have reached a streetlight or with less than five recorded waypoints were not  
368 included in this dataset. To investigate the local impact of the streetlights we added to the  
369 experimental field, we analysed flight trajectories up to a distance of 270 m from the release  
370 site as this was the maximal possible tracking range in the direction of the village  
371 Großseelheim for safety reasons. For the evaluation of the main flight direction displayed  
372 with arrows in Fig. 2, we determined the mean cardinal direction from the release site for  
373 every flight <sup>66</sup>. Hawk moths and lappet moths were not analysed together because they are  
374 native to different habitats and therefore perform different kinds of flights. Since hawk moths  
375 were not native to the experimental field, they should perform oriented and therefore rather  
376 straight flights to reach a more favourable habitat as fast as possible while lappet moths that  
377 are native to the experimental field should perform search flights to localize resources (e.g.  
378 females). This is especially relevant for the calculation of the tortuosity (Fig. 3), because a  
379 search path for local resources (lappet moths) differs from oriented flights to other landscape  
380 patches (hawk moths). According to Benhamou <sup>40</sup>, tortuosity was therefore analysed by  
381 calculating a sinuosity index for lappet moths and the straightness for hawk moths using a  
382 special R package (R package trajr <sup>67</sup>). For the calculation of the straightness, the distance of  
383 the beeline corresponded to 270 m for all individuals that left the radius of analysis (see  
384 above). For individuals that did not leave this circle, the beeline was calculated by subtracting  
385 the distance between the first waypoint of the trajectory to the release site from the distance  
386 between the last waypoint to the release site.

387 The software “Sky Quality Camera” (latest version 1.8.1, Euromix, Ljubljana, Slovenia) was  
388 used to calculate luminance values of 12 sectors spanning 30° each for the all-sky images.  
389 Since light conditions varied considerably between different nights, luminance values were  
390 normalized to compare light distribution patterns of different nights (Fig. 2). To normalize the  
391 values of the sectors, the mean luminance of the entire image was used:

$$\left( \frac{\text{mean luminance sector}}{\text{mean luminance whole image}} \right) / 12$$

392

393 Consequently, normalized values reflect the contribution of each sector to the mean overall  
394 luminance. Thus, the sum of all 12 segments equals the total contribution (100 %) to the mean  
395 overall luminance of an all-sky image.

#### 396 *Statistics*

397 We utilized U-tests (*t*-tests) to analyse differences between lights on and off conditions for the  
398 distance of last recorded waypoint to the closest light source as well as closest distance during  
399 flight to any light. To test for differences between the four control experiments we used  
400 Fisher’s exact test to analyse arrival frequency and a Generalized Linear Mixed Model  
401 (GLMM) with the experiment as fixed effect and the individual as random effect to analyse  
402 flight duration. All statistical tests specified so far have been conducted with SPSS (IBM  
403 SPSS Statistics Version 26), all those mentioned in the following with R <sup>68</sup>. Rayleigh tests for  
404 deviation from uniform circular angle distributions allowed identification of directional  
405 preferences (R package CircStats 0.2-6 <sup>69</sup>) and Fisher’s exact tests identified differences in  
406 final positions inside vs. outside the lamp circle. Beta regression with Tukey post-hoc tests  
407 revealed differences in tortuosity of flights (R package glmmTMB 1.0.2.1 <sup>70</sup>).

## 408 **Ethical Note**

409 Our study involved individuals of several moth species (Tab. S1) that were trapped in the  
410 wild. We obtained permission for capture and release from the Regional Council of Giessen,  
411 Germany. All moths were carefully handled during experiments and maintained under  
412 appropriate conditions.

## 413 **Supplementary Information**

414 Supplementary Information includes three tables and two figures.

## 415 **Acknowledgements**

416 We thank Professor Menzel for the possibility to rent the harmonic radar for our experiments  
417 and the farmers in Großseelheim who gave us access to their grassland. Furthermore, we  
418 would like to thank Julian Petrasch for capturing our setup from above with a drone. Funding  
419 was provided by DFG DE 2869/1-1.

## 420 **Author contributions**

421 J.D. designed the study, and M.S., A.Ja., S.W., T.W. and J.D. performed the experiments with  
422 substantial contributions of A.L.S. Radar data were extracted by M.S. and J.D., and M.S. and  
423 J.D. acquired and evaluated the data to quantify the light environment with substantial  
424 contributions of A.Je. and F.H. Data were analysed by T.D., O.M., C.B.L., T.H. and J.D. The  
425 original drafting of the article was done by J.D. and all authors contributed to the editing of  
426 subsequent drafts.

## 427 **Competing interests**

428 The authors declare no competing interests.

## 429 References

- 430 1. Gaston, K. J., Visser, M. E. & Hölker, F. The biological impacts of artificial light at  
431 night: the research challenge. *Philos. Trans. B* **370**, 20140133 (2015).
- 432 2. Kyba, C. C. M. *et al.* Artificially lit surface of Earth at night increasing in radiance and  
433 extent. *Sci. Adv.* **3**, 1–9 (2017).
- 434 3. Biesmeijer, J. C. *et al.* Parallel declines in pollinators and insect-pollinated plants in  
435 Britain and the Netherlands. *Science* **313**, 351–354 (2006).
- 436 4. Potts, S. G. *et al.* Safeguarding pollinators and their values to human well-being.  
437 *Nature* **540**, 220–229 (2016).
- 438 5. Owens, A. C. S. *et al.* Light pollution is a driver of insect declines. *Biol. Conserv.* **241**,  
439 108259 (2020).
- 440 6. Grubisic, M., van Grunsven, R. H. A., Kyba, C. C. M., Manfrin, A. & Hölker, F. Insect  
441 declines and agroecosystems: does light pollution matter? *Ann. Appl. Biol.* **173**, 180–  
442 189 (2018).
- 443 7. van Grunsven, R. H. A. *et al.* Experimental light at night has a negative long-term  
444 impact on macro-moth populations. *Curr. Biol.* **30**, R694–R695 (2020).
- 445 8. Hallmann, C. A. *et al.* More than 75 percent decline over 27 years in total flying insect  
446 biomass in protected areas. *PLoS One* **12**, (2017).
- 447 9. Sánchez-Bayo, F. & Wyckhuys, K. A. G. Further evidence for a global decline of the  
448 entomofauna. *Austral Entomol.* (2020).
- 449 10. Klein, A. M. *et al.* Importance of pollinators in changing landscapes for world crops.  
450 *Proc. R. Soc. B Biol. Sci.* **274**, 303–313 (2007).
- 451 11. Potts, S. G. *et al.* Global pollinator declines: Trends, impacts and drivers. *Trends Ecol.*  
452 *Evol.* **25**, 345–353 (2010).
- 453 12. Macgregor, C. J., Pocock, M. J. O., Fox, R. & Evans, D. M. Pollination by nocturnal  
454 Lepidoptera, and the effects of light pollution: A review. *Ecol. Entomol.* **40**, 187–198  
455 (2015).
- 456 13. Devoto, M., Bailey, S. & Memmott, J. The ‘night shift’: Nocturnal pollen-transport  
457 networks in a boreal pine forest. *Ecol. Entomol.* **36**, 25–35 (2011).
- 458 14. Fox, R. The decline of moths in Great Britain: a review of possible causes. *Insect*  
459 *Conserv. Divers.* **6**, 5–19 (2013).
- 460 15. Green, K. *et al.* Australian Bogong moths *Agrotis infusa* (Lepidoptera: Noctuidae),  
461 1951–2020: decline and crash. *Austral Entomol.* (2020).
- 462 16. Sánchez-Bayo, F. & Wyckhuys, K. A. G. Worldwide decline of the entomofauna: A  
463 review of its drivers. *Biol. Conserv.* **232**, 8–27 (2019).
- 464 17. Briolat, E. S., Gaston, K. J., Bennie, J., Rosenfeld, E. J. & Troscianko, J. Artificial  
465 nighttime lighting impacts visual ecology links between flowers, pollinators and  
466 predators. *Nat. Commun.* **12**, 1–8 (2021).
- 467 18. Riegel, K. W. Light pollution. *Science* **179**, 1285–1291 (1973).



- 468 19. Gaston, K. K. J., Duffy, J. P. J., Gaston, S., Bennie, J. & Davies, T. T. W. Human  
469 alteration of natural light cycles: causes and ecological consequences. *Oecologia* **176**,  
470 917–931 (2014).
- 471 20. Hölker, F. *et al.* 11 Pressing Research Questions on How Light Pollution Affects  
472 Biodiversity. *Front. Ecol. Evol.* **9**, 1–13 (2021).
- 473 21. Sanders, D., Frago, E., Kehoe, R., Patterson, C. & Gaston, K. J. A meta-analysis of  
474 biological impacts of artificial light at night. *Nat. Ecol. Evol.* **5**, 74–81 (2021).
- 475 22. Wehner, R. Astronavigation in insects. *Ann. Rev. Entomol* **29**, 277–298 (1984).
- 476 23. Warrant, E. & Dacke, M. Vision and visual navigation in nocturnal insects. *Annu. Rev.*  
477 *Entomol.* **56**, 239–254 (2011).
- 478 24. Sothibandhu, S. & Baker, R. R. Celestial orientation by the large yellow underwing  
479 moth, *Noctua pronuba* L. *Anim. Behav.* **27**, 786–800 (1979).
- 480 25. Mazokhin-Porshnijakov, G. Why insects fly to light by night. *Anzeiger für*  
481 *Schädlingskd.* **34**, 47 (1961).
- 482 26. Shimoda, M. & Honda, K. Insect reactions to light and its applications to pest  
483 management. *Appl. Entomol. Zool.* **48**, 413–421 (2013).
- 484 27. Owens, A. C. S. & Lewis, S. M. The impact of artificial light at night on nocturnal  
485 insects: A review and synthesis. *Ecol. Evol.* **8**, 11337–11358 (2018).
- 486 28. Robertson, B. A. & Blumstein, D. T. How to disarm an evolutionary trap. *Conserv. Sci.*  
487 *Pract.* **1**, 1–14 (2019).
- 488 29. Haynes, K. J. & Robertson, B. A. A transdisciplinary research agenda for  
489 understanding insect responses to ecological light pollution informed by evolutionary  
490 trap theory. *Curr. Opin. Insect Sci.* **45**, 91–96 (2021).
- 491 30. Baker, R. R. & Sadovy, Y. The distance and nature of the light-trap response of moths.  
492 *Nature* **276**, 818–821 (1978).
- 493 31. Merckx, T. & Slade, E. Macro-moth families differ in their attraction to light:  
494 Implications for light-trap monitoring programmes. *Insect Conserv. Divers.* **7**, 453–461  
495 (2014).
- 496 32. Gaydecki, P. Automated moth flight analysis in the vicinity of artificial light. *Bull.*  
497 *Entomol. Res.* **109**, 127–140 (2019).
- 498 33. Donners, M. *et al.* Colors of attraction: Modeling insect flight to light behavior. *J. Exp.*  
499 *Zool. Part A Ecol. Integr. Physiol.* **329**, 434–440 (2018).
- 500 34. Bowden, J. An analysis of factors affecting catches of insects in light-traps. *Bull.*  
501 *Entomol. Res.* **72**, 535–556 (1982).
- 502 35. Frank, K. D. Effects of artificial night lighting on moths. in *Ecological Consequences*  
503 *of Artificial Night Lighting* (eds. Rich, C. & Longcore, T.) 305–344 (2006).
- 504 36. Eisenbeis, G. Artificial night lighting and insects: attraction of insects to streetlamps in  
505 a rural setting in Germany. in *Ecological Consequences of Artificial Night Lighting*  
506 (eds. Rich, C. & Longcore, T.) 281–304 (Islandpress, 2006).

- 507 37. Degen, T. *et al.* Street lighting: sex-independent impacts on moth movement. *J. Anim.*  
508 *Ecol.* **85**, 1352–1360 (2016).
- 509 38. Storms, M. *et al.* The rising moon promotes mate finding in moths. *Commun. Biol.* **5**,  
510 1–6 (2022).
- 511 39. Jechow, A., Kyba, C. C. M. & Hölker, F. Beyond all-sky: Assessing ecological light  
512 pollution using multi-spectral full-sphere fisheye lens imaging. *J. Imaging* **5**, (2019).
- 513 40. Benhamou, S. How to reliably estimate the tortuosity of an animal's path: Straightness,  
514 sinuosity, or fractal dimension? *J. Theor. Biol.* **229**, 209–220 (2004).
- 515 41. Wakefield, A., Broyles, M., Stone, E. L., Harris, S. & Jones, G. Quantifying the  
516 attractiveness of broad-spectrum street lights to aerial nocturnal insects. *J. Appl. Ecol.*  
517 **55**, 714–722 (2018).
- 518 42. Macgregor, C. J., Evans, D. M., Fox, R. & Pocock, M. J. O. The dark side of street  
519 lighting: impacts on moths and evidence for the disruption of nocturnal pollen  
520 transport. *Glob. Chang. Biol.* **23**, 697–707 (2017).
- 521 43. Manfrin, A. *et al.* Artificial light at night affects organism flux across ecosystem  
522 boundaries and drives community structure in the recipient ecosystem. *Front. Environ.*  
523 *Sci.* **5**, (2017).
- 524 44. Walter, T. *et al.* A new innovative real-time tracking method for flying insects  
525 applicable under natural conditions. *BMC Zool.* **6**, 1–11 (2021).
- 526 45. Smith, M. T., Livingstone, M. & Comont, R. A method for low-cost, low-impact insect  
527 tracking using retroreflective tags. *Methods Ecol. Evol.* **12**, 2184–2195 (2021).
- 528 46. *Ecological consequences of artificial night lighting.* (Islandpress, 2006).
- 529 47. Van Tichelen, P. *et al.* *Study for the European Commission DG TREN unit D3. Final*  
530 *Report Lot 9 : Public street lighting.* (2007).
- 531 48. Giavi, S., Blösch, S., Schuster, G. & Knop, E. Artificial light at night can modify  
532 ecosystem functioning beyond the lit area. *Sci. Rep.* **10**, 1–11 (2020).
- 533 49. Knop, E. *et al.* Artificial light at night as a new threat to pollination. *Nature* **548**, 206–  
534 209 (2017).
- 535 50. Giavi, S., Fontaine, C. & Knop, E. Impact of artificial light at night on diurnal plant-  
536 pollinator interactions. *Nat. Commun.* **12**, 8–12 (2021).
- 537 51. Menzel, R. *et al.* A common frame of reference for learned and communicated vectors  
538 in honeybee navigation. *Curr. Biol.* **21**, 645–650 (2011).
- 539 52. Capaldi, E. A. *et al.* Ontogeny of orientation flight in the honeybee revealed by  
540 harmonic radar. *Nature* **403**, 537–540 (2000).
- 541 53. Osborne, J. L. *et al.* The ontogeny of bumblebee flight trajectories: From Naïve  
542 explorers to experienced foragers. *PLoS One* **8**, (2013).
- 543 54. Makinson, J. C. *et al.* Harmonic radar tracking reveals random dispersal pattern of  
544 bumblebee (*Bombus terrestris*) queens after hibernation. *Sci. Rep.* **9**, 1–11 (2019).

- 545 55. Cant, E. T., Smith, A. D., Reynolds, D. R. & Osborne, J. L. Tracking butterfly flight  
546 paths across the landscape with harmonic radar. *Proc. R. Soc. B Biol. Sci.* **272**, 785–  
547 790 (2005).
- 548 56. Ovaskainen, O. *et al.* Tracking butterfly movements with harmonic radar reveals an  
549 effect of population age on movement distance. *Proc. Natl. Acad. Sci. U. S. A.* **105**,  
550 19090–19095 (2008).
- 551 57. Riley, J. R. *et al.* Tracking bees with harmonic radar. *Nature* **379**, 29–30 (1996).
- 552 58. Riley, J. R., Greggers, U., Smith, a D., Reynolds, D. R. & Menzel, R. The flight paths  
553 of honeybees recruited by the waggle dance. *Nature* **435**, 205–207 (2005).
- 554 59. Perkin, E. K., Hölker, F. & Tockner, K. The effects of artificial lighting on adult  
555 aquatic and terrestrial insects. *Freshw. Biol.* **59**, 368–377 (2014).
- 556 60. Donatello, S. *et al.* *Revision of the EU Green Public Procurement Criteria for Road  
557 Lighting and traffic signals.* (2019).
- 558 61. Van Der Kooi, C. J., Stavenga, D. G., Arikawa, K., Belušič, G. & Kelber, A. Evolution  
559 of Insect Color Vision: From Spectral Sensitivity to Visual Ecology. *Annu. Rev.  
560 Entomol.* **66**, 435–461 (2021).
- 561 62. Jechow, A. *et al.* Tracking the dynamics of skyglow with differential photometry using  
562 a digital camera with fisheye lens. *J. Quant. Spectrosc. Radiat. Transf.* **209**, 212–223  
563 (2018).
- 564 63. Batsleer, F. *et al.* The neglected impact of tracking devices on terrestrial arthropods.  
565 *Methods Ecol. Evol.* **11**, 350–361 (2020).
- 566 64. Kim, J., Jung, M., Kim, H. G. & Lee, D.-H. H. Potential of harmonic radar system for  
567 use on five economically important insects: Radar tag attachment on insects and its  
568 impact on flight capacity. *J. Asia. Pac. Entomol.* **19**, 371–375 (2016).
- 569 65. Degen, J. *et al.* Exploratory behaviour of honeybees during orientation flights. *Anim.  
570 Behav.* **102**, 45–57 (2015).
- 571 66. Jammalamadaka, S.R. & SenGupta, A. Topics in Circular Statistics. Section 1.3, in  
572 (World Scientific Press, 2001).
- 573 67. McLean, D. J. & Skowron Volponi, M. A. trajr: An R package for characterisation of  
574 animal trajectories. *Ethology* **124**, 440–448 (2018).
- 575 68. R Core Team. R: A language and environment for statistical computing. R Foundation  
576 for Statistical Computing, Vienna, Austria (2022).
- 577 69. Agostinelli, C. & Lund, U. R package ‘circular’: Circular Statistics (version 0.4-7).  
578 (2013).
- 579 70. Brooks, M. *et al.* *Package ‘glmmTMB’ R topics documented: The R Journal* vol. 9  
580 (2017).
